# Supplementary material for: Fukushima Nuclear Accident Recorded in Tibetan Plateau Snow Pits
Source: PLoS One. 2015 Feb 6;10(2):e0116580. doi: 10.1371/journal.pone.0116580 (PMC4319914; doi:10.1371/journal.pone.0116580)
Supplement: S1 Dataset — (XLS) [file pone.0116580.s001.xls]

## Sheet: profile
beta radioactivity and d18O in the Tibetan snow pits
Yuzhufeng Gl.
Depth	beta radioactivity(dph/kg）	d18O(‰)
0-10cm	799.969	-7.62378
10-20cm	1786.16	-9.43095
20-30cm	1709.43	-10.6154
30-40cm	516.332	-17.4143
40-50cm	208.159	-19.8841
50-60cm	406.982	-19.4711
Tanggula Gl.
Depth	beta radioactivity(dph/kg）	d18O(‰)
1-10cm	588.007	-5.97051
10-20cm	414.52	-10.0076
20-30cm	343.428	-16.0751
30-40cm	7391.02	-19.2571
40-55cm	3552.73	-21.7014
Gurenhekou Gl.
Depth	beta radioactivity(dph/kg）	d18O(‰)
1-10cm	407.487	-6.45244
10-20cm	1657.41	-12.6414
20-30cm	499.121	-21.0352
30-40cm	189.317	-21.6691
Muztag Gl.
Depth	beta radioactivity(dph/kg）	d18O(‰)
1-10cm	435.711	-8.72422
10-20cm	467.946	-11.0989
20-30cm	1541.2	-10.1468
30-40cm	281.195	-18.7471
