# Supplementary material for: Fukushima Nuclear Accident Recorded in Tibetan Plateau Snow Pits
Source: PLoS One. 2015 Feb 6;10(2):e0116580. doi: 10.1371/journal.pone.0116580 (PMC4319914; doi:10.1371/journal.pone.0116580)
Supplement: S2 Dataset — (XLS) [file pone.0116580.s002.xls]

## Sheet: Sheet1
beta radioactivity in the Tanggula and Yuzhufeng ice cores
Tanggula ice core							Yuzhufeng ice core
Depth(m)	beta radioactivity (dph/kg)						Depth(m)	beta radioactivity (dph/kg)
0.26	443.385						1.62	687.522
0.48	586.643						2.14	48.9876
0.68	1193.9						2.72	455.673
0.88	38.4986						3.34	638.65
1.1	822.978						4.02	196.535
1.3	341.76						4.56	331.378
1.52	367.015						5.06	329.428
1.76	2685.25						5.58	833.04
2.02	907.04						6.14	368.387
2.26	337.319						6.64	271.544
2.48	72.1848						7.16	395.706
2.72	224.078						7.66	702.992
2.96	262.172						8.16	519.062
3.2	384.7						8.66	620.69
3.42	134.727						9.2	351.519
3.64	266.985						9.62	278.25
3.9	108.303						10.08	320.562
4	298.89						10.56	634.751
4.22	178.056						11.08	589.443
4.44	61.1122						11.6	544.252
4.66	84.2697						12.08	1153.99
4.92	176.874						12.58	833.23
5.14	153.31						13.04	476.159
5.36	627.256						13.6	1387.7
5.6	230.572						14.06	881.821
5.86	134.745						14.54	1331.38
6.14	252.597						15.02	546.142
6.4	154.494						15.52	344.172
6.66	336.06						16	451.953
6.92	238.379						16.54	431.091
7.16	166.524						17.06	542.004
7.4	1102.02						17.68	472.046
7.66	191.485						18.24	824.047
7.9	1003.76						18.76	270.236
8.14	622.532						19.3	184.049
8.38	314.66						19.76	163.67
8.62	370.036						20.28	105.813
8.84	1101.62						20.78	73.8137
9.06	1126.08						21.28	154.67
9.3	961.499						21.78	228.739
9.52	1924.16						22.32	228.661
9.76	3046.03						22.86	193.252
10	105.871						23.36	141.352
10.22	419.637						23.84	382.103
10.46	173.221						24.36	242.531
10.7	110.546						24.88	200.87
10.94	65.0407						25.4	190.616
11.18	104.887						26	120.945
11.4	58.6643						26.5	207.975
11.64	66.3277						27.04	146.931
11.86	260.163						27.52	154.801
12.1	243.147						28	164.499
12.34	108.303						28.46	228.992
12.56	153.715						28.96	143.695
12.8	110.683						29.44	222.992
13.02	40.7415						30	136.196
13.26	60.8614						30.5	94.8543
13.52	66.3277						31.04	172.436
13.76	78.9779						31.6	101.23
14	76.2813						32.16	88.383
14.24	22.5632						32.7	114.37
14.48	51.2383						33.24	190.866
14.7	67.3725						33.88	246.626
14.94	215.93						34.52	87.4148
15.22	84.2697						35.2	284.128
15.46	48.6403						36	132.865
15.7	37.1661						36.5	166.722
15.96	76.2813						37	158.358
16.2	49.639						37.56	224.882
16.44	345.858						38.12	132.515
16.68	322.425						38.66	180.409
16.94	110.002						39.2	143.044
17.16	0						39.82	156.063
17.42	26.5311						40.46	96.4178
17.66	23.2288						41.04	284.457
17.9	28.6055						41.6	156.85
18.12	0						42.2	99.3865
18.36	8.53971						42.76	133.912
18.6	16.2966						43.32	80.3396
18.8	0						43.9	113.884
19.02	9.3633						44.44	118.514
19.42	7.39208						45	211.144
							45.54	153.071
							46.16	99.3865
							46.7	119.033
							47.36	176.355
							48	132.865
